# Supplementary material
Source: PubMed Central journal article supplement (PMC5424255)
Supplement: JB.00799-16_zjb999094406s1.pdf [file JB.00799-16_zjb999094406s1.pdf]

A.

5' AATAAAAACGTCGAGTTGTGTCGCACTCACATATACAATATATAGAAGCTAGAGAAAAATCTGTCACTATTA  
 GCCCTGTGAAACAAGTTGAGATTCAATACATCCACTTGGGTTAAACGTGATGAACATAGAGTATTGAGGTTTTT  
 GAGATGATGATGAGAATAAAGCAAAGCATTACAAGCCGCTTTGAGCCAAATTGAGAAGCAATTTGGTAAAAATAC  
 GGTTATGCGTCTTGGTGATAAAGCTGTTCAAGCAGTTGAAGCCGTATCTACAGTTCCTTAACT 3'

← R2 ← 5'  
← R1 ← 5'

C.

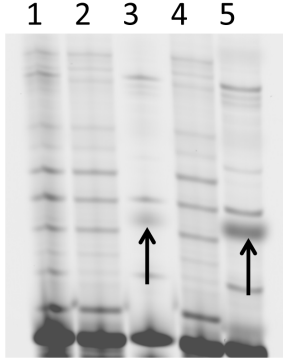

1: Control - No RNA, Both Primers  
 2: RNA from *Ab* WT, R2 Primer  
 3: RNA from *Ab* WT, R1 Primer  
 4: RNA from *Ab* WT (+cip), R2 primer  
 5: RNA from *Ab* WT (+cip), R1 primer

~35-40nt

B.

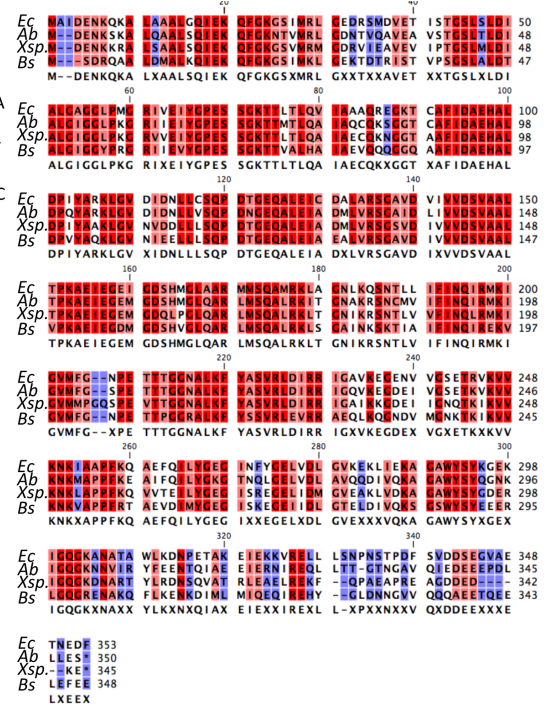

1

2 **Fig S1. Primer extension assay suggests mRNA structure. (A)** Schematic of the *recA* gene

3 and upstream region. The ATG is indicated in red, and primers used for primer extension assay

4 are shown in as blue arrows. (B) Multiple sequence alignment (CLC Genomics) showing the

5 *RecA* coding sequence conservation among different bacteria to determine starting methionine.

6 *Ec*, *E. coli*; *Ab*, *A. baumannii*; *X sp.*, *Xanthomonas* species; *Bs*, *Bacillus subtilis*. Red boxes

7 indicate conservation. The consensus *RecA* sequence is shown underneath the compound

8 sequences. (C) Separated products of extension assay on a 10% denaturing acrylamide gel

9 containing urea and visualized using the Typhoon 8600 Imager (General Electric Hartford, CT).

10 Using fluorescently labeled primers R1 downstream of the ATG and R2 upstream of it, first

11 strand cDNA synthesis was performed at 65°C using the Maxima H Minus First Strand cDNA

12 Synthesis Kit (Thermo Fisher) on RNA extracted from *A. baumannii* cells with or without cip

13 treatment as described in the main Methods section. This experiment should result in a size

14 product encompassing the reverse primer up to the +1 transcriptional start including the  
15 ribosomal binding site. Control reactions did not contain RNA template. Unique bands were only  
16 readily observed in lanes 3 and 5, which are estimated to be 35-40nt in length based on control  
17 primers of known sizes run on the same gel. The increase in product in lane 5 indicates that there  
18 was a higher amount of transcript template, as would be expected in cells that were treated with  
19 DNA damage. The short product from Primer R1 is within the coding region of the *recA* gene,  
20 indicating that the mRNA structure may be occluding further extension. No product observed  
21 when using Primer R2 may indicate structural occlusion of the mRNA template.

22

23

24

25

26

27

28

29

30

31

32

33

34

35

36

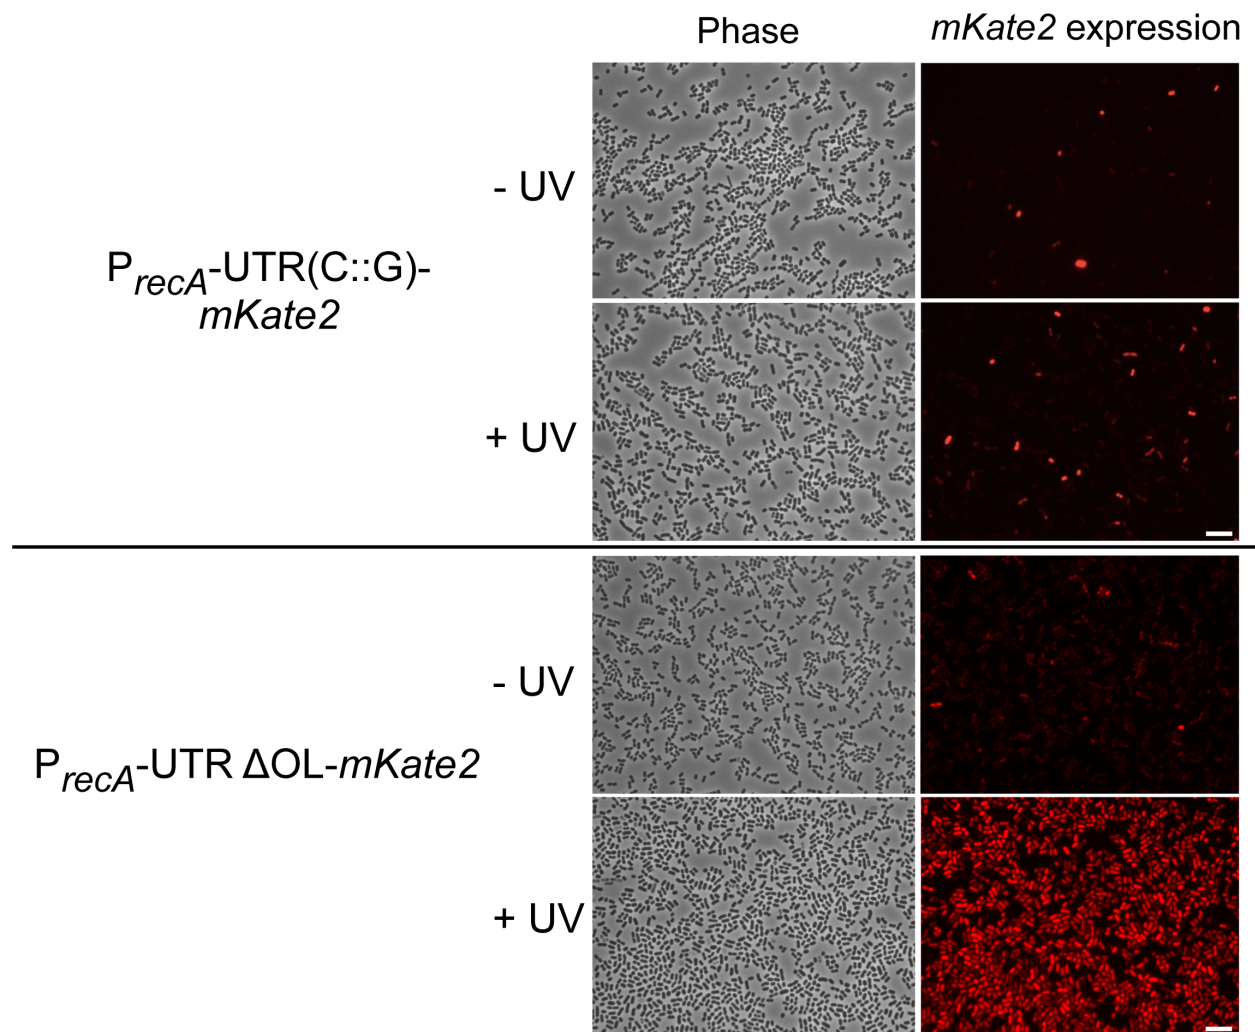

37  
38 **Fig S2. Strain with the plasmid borne *mKate2* reporter responds to UV radiation**  
39 **treatment.** Representative fluorescent microscopy images of *A. baumannii* cells with the native  
40  $P_{recA}$ -UTR(C::G)-*mKate2* and with the variant  $P_{recA}$ -UTR(ΔOL)-*mKate2* reporters without (-) or  
41 with (+) UV treatment. Scale bar represents 10μm. For treatment saturated liquid cultures were  
42 diluted 1:100 in LB and grown for 3 hours to exponential phase. Cells were then washed in SMO  
43 (100mM NaCl, 20mM Tris-HCl, pH 7.5) and spread in a glass petri dish. Plates were irradiated  
44 in the dark under a UV germicidal lamp with 54 J/m<sup>2</sup>. Cells were recovered in 5mL of LB  
45 medium for 3 hours before imaging.

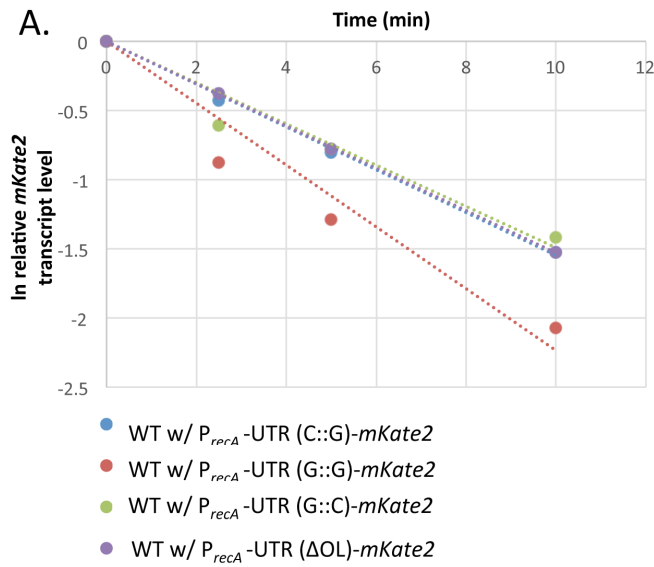

**B.**

|                          | k      | R <sup>2</sup> | Half-life (min, ± SD) |
|--------------------------|--------|----------------|-----------------------|
| UTR(C::G)- <i>mKate2</i> | -0.155 | 0.99           | 4.5 (3.8-5.6)         |
| UTR(G::G)- <i>mKate2</i> | -0.252 | 0.79           | 2.8 (2.5-3.2)         |
| UTR(G::C)- <i>mKate2</i> | -0.144 | 0.83           | 4.8 (4.4-5.3)         |
| UTR(ΔOL)- <i>mKate2</i>  | -0.153 | 0.99           | 4.5(4.0-5.1)          |

46

47 **Fig S3. *mKate2* mRNA decay curves and half-life.** (A) Plot of the natural logarithm (ln) of  
 48 relative *mKate2* mRNA expression for each time point post rifampicin treatment. Half-life was  
 49 calculated as described in the methods. (B) Table summary of rate constants, R<sup>2</sup>, and half-life [±  
 50 standard deviation (SD)] for each variant.

51

52

53

54

55

56

57

58

59

60

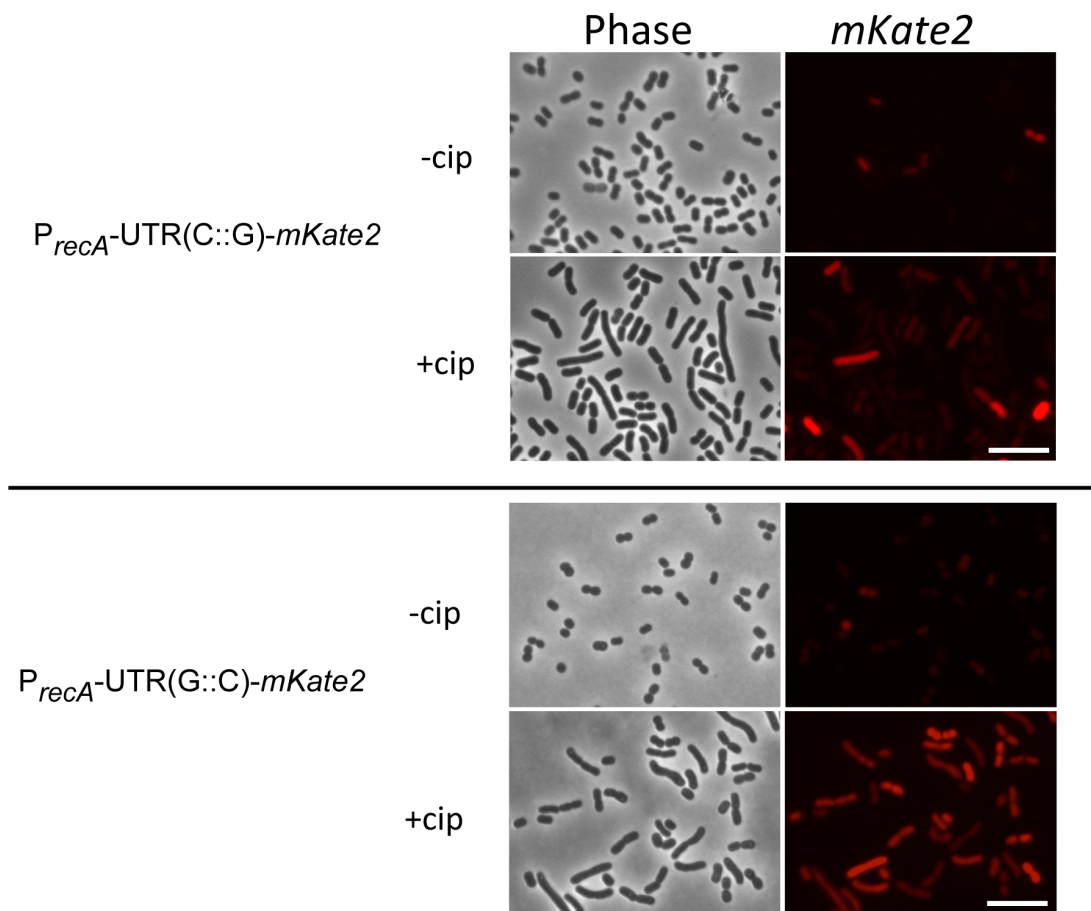

61  
 62 **Fig S4. Cells with the native  $P_{recA}$ -UTR(G::C)-*mKate2* reporter have increased expression**  
 63 **upon DNA Damage treatment.** Representative phase and fluorescent microscopy images of the  
 64 *A. baumannii* WT cells with the  $P_{recA}$ -UTR(C::G)-*mKate2* reporter compared to the  $P_{recA}$ -  
 65 UTR(G::C)-*mKate2* reporter without (-) or with 10X MIC cip (+).

66  
 67  
 68  
 69

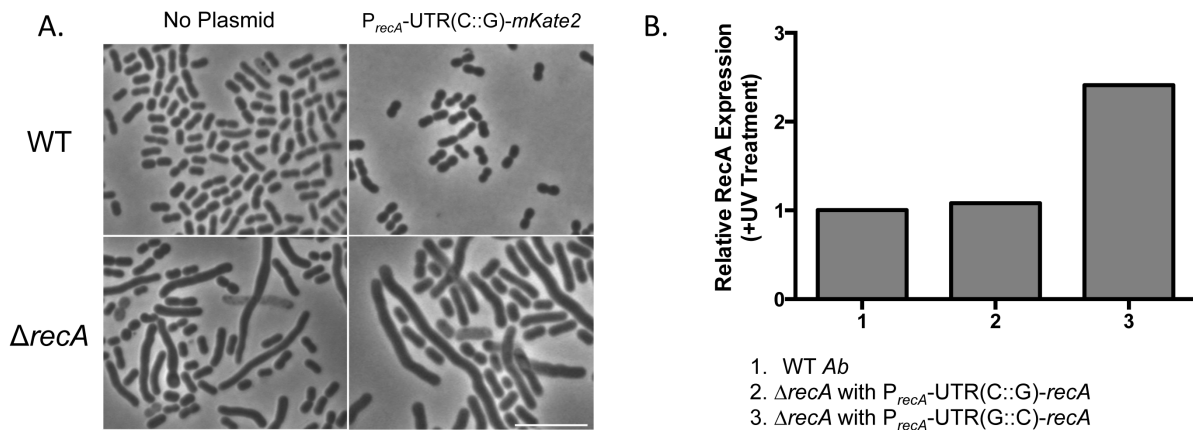

70

71 **Fig S5. The elongation phenotype of *A. baumannii*  $\Delta recA$  is not rescued by pNLAC1**  
 72 **bearing *mKate2* in place of *recA*, while DNA damage treatment alters RecA protein levels.**

73 **(A)** The plasmid borne  $P_{recA}$ -UTR(C::G)-*mKate2* reporter with the native UTR does not affect  
 74 cell physiology. Representative contrast phase images of WT *A. baumannii* cells with no plasmid  
 75 and with the plasmid containing the native  $P_{recA}$ -UTR(C::G)-*mKate2* reporter. Also shown are  
 76 images of *A. baumannii*  $\Delta recA$  cells with no plasmid and with the native reporter. Cells shown  
 77 are in the absence of DNA damage treatment. Scale bar represents 10 $\mu$ m. **(B)** Immunoblot to  
 78 detect RecA from UV treated (27 J/m<sup>2</sup>) WT cells and  $\Delta recA$  cells with plasmid borne,  $P_{recA}$ -  
 79 UTR(C::G)-*recA* compared to  $P_{recA}$ -UTR(G::C)-*recA*. Total protein loaded per lane was  
 80 standardized to the RpoB loading control as shown in Fig 5B. Graph shows relative protein  
 81 expression with WT cells set as 1. A comparative experiment using the isogenic  $\Delta recA$  strain and  
 82  $\Delta recA$  with  $P_{recA}$ -UTR(G::G)-*recA* could not be performed due to their sensitivity to UV  
 83 irradiation.

84

85

86 **Table S1. Variant *A. baumannii* recA UTR Sequences**

| Name                  | Sequence                                                                                                |
|-----------------------|---------------------------------------------------------------------------------------------------------|
| UTR(C::G)<br>(native) | GAGAAAAAATCTGTCACTATTAGCCCTGTGAAACAAGTTGAGATTCAATACATCCACTTGGGTT<br>AAACGTGATGAACATAGAGTATTGAGGTTTTTGAG |
| UTR(G::G)             | GAGAAAAAATCTGTCACTATTAGGGGTGTGAAACAAGTTGAGATTCAATACATCCACTTGGGTT<br>AAACGTGATGAACATAGAGTATTGAGGTTTTTGAG |
| UTR(G::C)             | GAGAAAAAATCTGTCACTATTAGGGGTGTGAAACAAGTTGAGATTCAATACATCCACTTCCCTT<br>AAACGTGATGAACATAGAGTATTGAGGTTTTTGAG |
| UTR( $\Delta$ OL)     | GAGAAAAAATCTGTCACTATTAGCCCTGTGAAACAAGTTGAGATTCAATACATCCACTTGGGTT<br>AAACGTGATGAACATGTTTTTGAG            |

87  
88  
89  
90  
91  
92  
93  
94  
95  
96  
97  
98  
99  
100  
101  
102  
103  
104  
105  
106  
107  
108  
109  
110  
111  
112  
113  
114  
115  
116  
117  
118

119 **Table S2. Plasmids and Strains used in this study**

| Plasmid                                                           | Description                                                                                                                              | Reference                        |
|-------------------------------------------------------------------|------------------------------------------------------------------------------------------------------------------------------------------|----------------------------------|
| pNLAC1                                                            | <i>ori-repM</i> ( <i>A.baumannii</i> ), <i>oripMB1</i> ( <i>E. coli</i> ), Amp <sup>R</sup> Tet <sup>R</sup>                             | Gift of T. Russo ([1])           |
| pCC1 ( <i>P<sub>recA</sub></i> -UTR(C::G)- <i>mKate2</i> )        | pNLAC1 containing <i>recA</i> (A1S_1962) promoter-UTR(C::G)- <i>mKate2</i> , with, Tet <sup>R</sup>                                      | This work                        |
| pCC2( <i>P<sub>recA</sub></i> -UTR(G::G)- <i>mKate2</i> )         | pNLAC1 containing <i>recA</i> (A1S_1962) promoter-UTR(G::G)- <i>mKate2</i> , Tet <sup>R</sup>                                            | This work                        |
| pCC3( <i>P<sub>recA</sub></i> -UTR( $\Delta$ OL)- <i>mKate2</i> ) | pNLAC1 containing <i>recA</i> (A1S_1962) promoter-UTR( $\Delta$ OL)- <i>mKate2</i> , Tet <sup>R</sup>                                    | This work                        |
| pCC4 ( <i>P<sub>recA</sub></i> -UTR(C::G)- <i>recA</i> )          | pNLAC1 containing <i>recA</i> (A1S_1962) promoter-UTR(C::G)- <i>recA</i> , Tet <sup>R</sup>                                              | This work                        |
| pCC5 ( <i>P<sub>recA</sub></i> -UTR(G::G)- <i>recA</i> )          | pNLAC1 containing <i>recA</i> (A1S_1962) promoter-UTR(G::G)- <i>recA</i> , Tet <sup>R</sup>                                              | This work                        |
| pCC6 ( <i>P<sub>recA</sub></i> -UTR(G::C)- <i>recA</i> )          | pNLAC1 containing <i>recA</i> (A1S_1962) promoter-UTR(G::C)- <i>recA</i> , Tet <sup>R</sup>                                              | This work                        |
| pCC7 ( <i>P<sub>trpB</sub></i> -UTR(C::G)- <i>mKate2</i> )        | pNLAC1 containing <i>trpB</i> (A1S_1692) promoter-UTR(C::G)- <i>mKate2</i> , Tet <sup>R</sup>                                            | This work                        |
| pCC8 (Promoterless <i>mKate2</i> )                                | pNLAC1 containing promoterless <i>mKate2</i> , Tet <sup>R</sup>                                                                          | This work                        |
| pCC9 ( <i>P<sub>recA</sub></i> -NO UTR- <i>mKate2</i> )           | pNLAC1 containing <i>recA</i> (A1S_1962) promoter- <i>mKate2</i> , Tet <sup>R</sup>                                                      | This work                        |
| pCC10 ( <i>P<sub>trpB</sub></i> -NO UTR- <i>mKate2</i> )          | pNLAC1 containing <i>trpB</i> (A1S_1692) promoter- <i>mKate2</i> , Tet <sup>R</sup>                                                      | This work                        |
| pYC251                                                            | contains <i>mKate2</i> coding sequence                                                                                                   | Gift of Y. Chai                  |
| Strain                                                            | Description                                                                                                                              | Reference                        |
| <i>A. baumannii</i>                                               | ATCC17978 Parental strain                                                                                                                | American Type Culture Collection |
| <i>A. baumannii</i> $\Delta$ <i>recA</i>                          | ATCC17978 <i>recA::km</i>                                                                                                                | Gift of G. Bou ([2])             |
| CC002                                                             | ATCC17978 with pCC1                                                                                                                      | This work                        |
| CC034                                                             | ATCC17978 $\Delta$ <i>recA</i> with pCC1                                                                                                 | This work                        |
| CC068                                                             | ATCC17978 with pCC3                                                                                                                      | This work                        |
| CC302                                                             | ATCC17978 with pCC2                                                                                                                      | This work                        |
| CC314                                                             | ATCC17978 with pCC4                                                                                                                      | This work                        |
| CC315                                                             | ATCC17978 $\Delta$ <i>recA</i> with pCC4                                                                                                 | This work                        |
| CC334                                                             | ATCC17978 $\Delta$ <i>recA</i> with pCC5                                                                                                 | This work                        |
| CC357                                                             | ATCC17978 $\Delta$ <i>recA</i> with pCC6                                                                                                 | This work                        |
| CC364                                                             | ATCC17978 with pCC7                                                                                                                      | This work                        |
| CC382                                                             | ATCC17978 with pCC10                                                                                                                     | This work                        |
| CC401                                                             | ATCC17978 with pCC9                                                                                                                      | This work                        |
| <i>E. coli</i> <i>P<sub>recA</sub></i> - <i>gfp</i>               | <i>Escherichia coli</i> P90C, F- <i>ara</i> $\Delta$ ( <i>lac-proB</i> )XIII <i>thi</i> , with pUA66- <i>recA</i> -GFP, kan <sup>R</sup> | ([3])                            |

120  
121  
122  
123  
124  
125  
126  
127  
128  
129  
130  
131  
132  
133  
134  
135  
136  
137

References:

1. Luke NR, Sauberan SL, Russo TA, Beanan JM, Olson R, Loehfelm TW, Cox AD, Michael FS, Vinogradov E V., Campagnari AA (2010) Identification and characterization of a glycosyltransferase involved in *Acinetobacter baumannii* lipopolysaccharide core biosynthesis. *Infect Immun* **78**: 2017–2023.
2. Aranda J, Bardina C, Beceiro A, Rumbo S, Cabral MP, Barbé J, Bou G (2011) *Acinetobacter baumannii* RecA protein in repair of DNA damage, antimicrobial resistance, general stress response, and virulence. *J Bacteriol* **193**: 3740–3747.
3. Benson RW, Norton MD, Lin I, Du Comb WS, Godoy VG (2011) An active site aromatic triad in *Escherichia coli* DNA Pol IV coordinates cell survival and mutagenesis in different DNA damaging agents. *PLoS One* **6**: e19944.



**Table S3. Oligonucleotides used in this study**

| Name                                             | Sequence (5' to 3')                                                                                                                                                                                                                                                                                                                                                                                                                                                                                                                                                                                                                                                                                                                                                                                                                                                                                                                                                                                                       |
|--------------------------------------------------|---------------------------------------------------------------------------------------------------------------------------------------------------------------------------------------------------------------------------------------------------------------------------------------------------------------------------------------------------------------------------------------------------------------------------------------------------------------------------------------------------------------------------------------------------------------------------------------------------------------------------------------------------------------------------------------------------------------------------------------------------------------------------------------------------------------------------------------------------------------------------------------------------------------------------------------------------------------------------------------------------------------------------|
| 16SRNAF                                          | GACTCCTACGGGAGGCWGCAG                                                                                                                                                                                                                                                                                                                                                                                                                                                                                                                                                                                                                                                                                                                                                                                                                                                                                                                                                                                                     |
| 16SRNAR                                          | GTATTACCGCGGCTGCTGG                                                                                                                                                                                                                                                                                                                                                                                                                                                                                                                                                                                                                                                                                                                                                                                                                                                                                                                                                                                                       |
| F1                                               | GTTGAGATTCAATACATCCACTTGG                                                                                                                                                                                                                                                                                                                                                                                                                                                                                                                                                                                                                                                                                                                                                                                                                                                                                                                                                                                                 |
| F2                                               | CCTGTGAAACAAGTTGAGATTCAA                                                                                                                                                                                                                                                                                                                                                                                                                                                                                                                                                                                                                                                                                                                                                                                                                                                                                                                                                                                                  |
| F3                                               | GTCACTATTAGCCCTGTGAAAC                                                                                                                                                                                                                                                                                                                                                                                                                                                                                                                                                                                                                                                                                                                                                                                                                                                                                                                                                                                                    |
| F4                                               | AGAAAAAATCTGTCACTATTAGCC                                                                                                                                                                                                                                                                                                                                                                                                                                                                                                                                                                                                                                                                                                                                                                                                                                                                                                                                                                                                  |
| F5                                               | AGAAGCTAGAGAAAAAATCTGTC                                                                                                                                                                                                                                                                                                                                                                                                                                                                                                                                                                                                                                                                                                                                                                                                                                                                                                                                                                                                   |
| F6                                               | CATATACAATATATAGAAGCTAGAG                                                                                                                                                                                                                                                                                                                                                                                                                                                                                                                                                                                                                                                                                                                                                                                                                                                                                                                                                                                                 |
| MCSmKate2F                                       | GTACCTGCAGGAGCTCTCTAGATTGAGTTTTTGGAGATGGATTCAATAG                                                                                                                                                                                                                                                                                                                                                                                                                                                                                                                                                                                                                                                                                                                                                                                                                                                                                                                                                                         |
| MCSmKate2R                                       | GTACCTGCAGGGTACCATCGGATCCTTATCTGTGCCCCAG                                                                                                                                                                                                                                                                                                                                                                                                                                                                                                                                                                                                                                                                                                                                                                                                                                                                                                                                                                                  |
| mKate2F                                          | TGATGGATTCAATAGAAAAGGTAAGCGAGCTGATTAAG                                                                                                                                                                                                                                                                                                                                                                                                                                                                                                                                                                                                                                                                                                                                                                                                                                                                                                                                                                                    |
| mKate2qPCRF                                      | GGTAAGCGAGCTGAATTAAGGA                                                                                                                                                                                                                                                                                                                                                                                                                                                                                                                                                                                                                                                                                                                                                                                                                                                                                                                                                                                                    |
| mKate2qPCR                                       | GCTTGCCTTCGCCCTCG                                                                                                                                                                                                                                                                                                                                                                                                                                                                                                                                                                                                                                                                                                                                                                                                                                                                                                                                                                                                         |
| mKate2R                                          | ACCACGATGCCTGCAGATCGGATCCTTATCT                                                                                                                                                                                                                                                                                                                                                                                                                                                                                                                                                                                                                                                                                                                                                                                                                                                                                                                                                                                           |
| PNLACF                                           | AGTTTGCGCAACGTTGTTGCCA                                                                                                                                                                                                                                                                                                                                                                                                                                                                                                                                                                                                                                                                                                                                                                                                                                                                                                                                                                                                    |
| PNLACR                                           | AACGACGAGCGTGACACCAC                                                                                                                                                                                                                                                                                                                                                                                                                                                                                                                                                                                                                                                                                                                                                                                                                                                                                                                                                                                                      |
| PrecAF                                           | GTTGCCATTGCTGCACGACCTGACCATAGA                                                                                                                                                                                                                                                                                                                                                                                                                                                                                                                                                                                                                                                                                                                                                                                                                                                                                                                                                                                            |
| PrecAF2                                          | GTACGAGCTCCGACCTGACCATAGACCAAG                                                                                                                                                                                                                                                                                                                                                                                                                                                                                                                                                                                                                                                                                                                                                                                                                                                                                                                                                                                            |
| PrecAR                                           | GTA CTCTAGATCTAGCTTCTATATATTGTATATGTGAGTG                                                                                                                                                                                                                                                                                                                                                                                                                                                                                                                                                                                                                                                                                                                                                                                                                                                                                                                                                                                 |
| PtrpF                                            | GTACGAGCTCGTCGTAGGTGATGCCAGTAT                                                                                                                                                                                                                                                                                                                                                                                                                                                                                                                                                                                                                                                                                                                                                                                                                                                                                                                                                                                            |
| PtrpR                                            | GTA CTCTAGAATCATCCCTCTTTTTAAATTATTAAG                                                                                                                                                                                                                                                                                                                                                                                                                                                                                                                                                                                                                                                                                                                                                                                                                                                                                                                                                                                     |
| R1                                               | Cy5-CAAAGCATTACAAGCCGCTT                                                                                                                                                                                                                                                                                                                                                                                                                                                                                                                                                                                                                                                                                                                                                                                                                                                                                                                                                                                                  |
| R2                                               | Cy5-ATCACGTTTAACCCAAGT                                                                                                                                                                                                                                                                                                                                                                                                                                                                                                                                                                                                                                                                                                                                                                                                                                                                                                                                                                                                    |
| recAmKate2R                                      | CTATTGAATCCATCAGTGTTATCACCAAGACG                                                                                                                                                                                                                                                                                                                                                                                                                                                                                                                                                                                                                                                                                                                                                                                                                                                                                                                                                                                          |
| recAmidF                                         | GCACGCAAACCTTGGTGTAGA                                                                                                                                                                                                                                                                                                                                                                                                                                                                                                                                                                                                                                                                                                                                                                                                                                                                                                                                                                                                     |
| recAmidR                                         | GCGCCTGAACGGACAAG                                                                                                                                                                                                                                                                                                                                                                                                                                                                                                                                                                                                                                                                                                                                                                                                                                                                                                                                                                                                         |
| recAR                                            | ACCACGATGCCTGCAAATTACGATTCTAATAAAAAGATCT                                                                                                                                                                                                                                                                                                                                                                                                                                                                                                                                                                                                                                                                                                                                                                                                                                                                                                                                                                                  |
| SD1F                                             | ATCTGTCACTATTAGGGGTGTGAAACAAGTTGAGATTC                                                                                                                                                                                                                                                                                                                                                                                                                                                                                                                                                                                                                                                                                                                                                                                                                                                                                                                                                                                    |
| SD1R                                             | CTAATAGTGACAGATTTTTTCTCTAGCTTCTATATATTGT                                                                                                                                                                                                                                                                                                                                                                                                                                                                                                                                                                                                                                                                                                                                                                                                                                                                                                                                                                                  |
| SD2F                                             | GGGTTAAACGTGATGAACATGTTTTTGGAGATGGATGAGAA                                                                                                                                                                                                                                                                                                                                                                                                                                                                                                                                                                                                                                                                                                                                                                                                                                                                                                                                                                                 |
| SD2R                                             | ATGTTTCATCACGTTTAACCCAAGTGGATGTATTGAATCTC                                                                                                                                                                                                                                                                                                                                                                                                                                                                                                                                                                                                                                                                                                                                                                                                                                                                                                                                                                                 |
| SD3F                                             | TCAATACATCCACTTCCCTTAAACGTGATGAACATAGAG                                                                                                                                                                                                                                                                                                                                                                                                                                                                                                                                                                                                                                                                                                                                                                                                                                                                                                                                                                                   |
| SD3R                                             | AAGTGGATGTATTGAATCTCAACTTGTTTCACAGGGCTAA                                                                                                                                                                                                                                                                                                                                                                                                                                                                                                                                                                                                                                                                                                                                                                                                                                                                                                                                                                                  |
| <i>P<sub>trp</sub></i> -UTR(C::G)- <i>mKate2</i> | GTTGCCATTGCTGCAGAGCTCGTCGTAGGTGATGCCAGTATGGCACCAGTATGAGCTGA<br>AATCGGTAGGTGGCTCAGTTGAATATATGAATGATGAAGCTGGTGAAGTTTGGTTACGT<br>CGCCTACGCCAGCATTTTTGATAAAACAGCATGGTTAAACCCTGAAACAGAAGGGTATT<br>GGCATTACACTCAAACAATTGGTTGGATTAAGAGATTTTTGAAAACCATATGTATCCAA<br>TGACCCTAAAAGGCATTGAAGTTTGACGCGTTACCTTTCTCGATAAACTTGATAACTTT<br>AATAATTTAAAAAGAGGGATGATTCTAGAAAAAATCTGTCACTATTAGCCCTGTGAAAC<br>AAGTTGAGATTCAATACATCCACTTGGGTTAAACGTGATGAACATAGAGTATTGAGGTT<br>TTTGGAGATGGATTCAATAGAAAAGGTAAGCGAGCTGATTAAGGAGAACATGCACATGA<br>AGCTGTACATGGAGGGCACCGTGAACAACCACCTTCAAGTGCACATCCGAGGGCG<br>AAGGCAAGCCCTACGAGGGCACCCAGACCATGAGAATCAAGGCGGTGAGGGGCGGC<br>CCTCTCCCTTCGCCTTCGACATCCTGGCTACCAGCTTTCATGTACGGCAGCAAAACCT<br>TCATCAACCACACCCAGGGCATCCCCGACTTCTTTAAGCAGTCTTCCCTGAGGGCTT<br>CACATGGGAGAGAGTCAACCACATACGAAGACGGGGGCGTGCTGACCGCTACCCAGGA<br>CACCAGCCTCCAGGACGGCTGCCTCATCTACAACGTCAAGATCAGAGGGGTGAACTT<br>CCCATCCAACGGCCCTGTGATGCAGAAGAAAACACTCGGCTGGGAGGCCTCCACCGA<br>GACGCTGTACCCGCTGACGGCGGCCTGGAAGGCAGAGCCGACATGGCCCTGAAGC |

|  |                                                                                                                                                                                                                                                                  |
|--|------------------------------------------------------------------------------------------------------------------------------------------------------------------------------------------------------------------------------------------------------------------|
|  | TCGTGGGCGGGGGCCACCTGATCTGCAACTTGAAGACCACATACAGATCCAAGAAAC<br>CCGCTAAGAACCTCAAGATGCCCGGCGTCTACTATGTGGACAGAAGACTGGAAAGAAT<br>CAAGGAGGCCGACAAAGAGACCTACGTGAGCAGCACGAGGTGGCTGTGGCCAGATA<br>CTGCGACCTCCCTAGCAAACCTGGGGCACAGATAAGGATCCGATCGCGGCCGCCTGCA<br>GGCATCGTGGT |
|--|------------------------------------------------------------------------------------------------------------------------------------------------------------------------------------------------------------------------------------------------------------------|

140

141

142

143
